# Supplementary material for: m6A eraser ALKBH5 mitigates the apoptosis of cardiomyocytes in ischemia reperfusion injury through m6A/SIRT1 axis
Source: PeerJ journal article supplement (doi:10.7717/peerj.15269), 2023-05-11
Supplement: Raw_data.zip [file Raw_data.zip]

## Sheet: Sheet1
Sample Number		U6	repeat 1	repeat 2		Atg12	repeat 1	repeat 2			△CT				△△CT				2-△△CT
	Control	16.73	17.032	16.881		27.039	26.844	26.9415		10.309	9.812	10.0605	10.0605	0.2485	-0.2485	0		0.841771	1.18797	1
	miR-NC	16.48	16.34	16.664		23.967	24.373	24.136		7.487	8.033	7.472		-2.5735	-2.0275	-2.5885		5.95252	4.07698	6.01473
	miR-21 mimic	17.196	17.41	17.822		27.833	27.808	28.405		10.637	10.398	10.583		0.5765	0.3375	0.5225		0.670589	0.791412	0.696164
