# Supplementary material for: m6A eraser ALKBH5 mitigates the apoptosis of cardiomyocytes in ischemia reperfusion injury through m6A/SIRT1 axis
Source: PeerJ. 2023 May 11;11:e15269. doi: 10.7717/peerj.15269 (PMC10183170; doi:10.7717/peerj.15269)
Supplement: Supplemental Information 6 [file peerj-11-15269-s006.xlsx]

## Sheet: Sheet1
RT-PCR
			GAPDH				SIRT1				△CT				△△CT					2-△△CT
si-NC		18.425	18.26	18.398		20.45	20.4565	20.557		2.025	2.1965	2.159	2.12683	-0.101833	0.0696667	0.0321667		1.07314	0.952858	0.97795	1.00131
si-SIRT1-1		18.422	17.95	17.853		21.852	20.714	22.614		3.43	2.764	4.761		1.405	0.5675	2.602		0.377618	0.674785	0.16471	0.405704
pcDNA3.1-NC		18.294	18.446	18.534		21.565	22.674	22.631		3.271	4.228	4.097		-0.159	1.464	-0.664		1.11651	0.362487	1.58447	1.02116
pcDNA3.1-SIRT1		18.082	18.86	18.361		20.651	20.238	20.471		2.569	1.378	2.11		-0.861	-1.386	-2.651		1.8163	2.61353	6.28102	3.57028
